# Supplementary material for: Comparison of Cefotaxime-Resistant Escherichia coli and sul1 and intI1 by qPCR for Monitoring of Antibiotic Resistance of Wastewater, Surface Water, and Recycled Water
Source: MDPI journal article supplement (doi:10.3390/antibiotics12081252), 2023-07-29
Supplement: s1 [file s1]

## SUPPLEMENTARY MATERIALS

### Comparison of Cefotaxime-Resistant *Escherichia coli* and *sul1* and *intI1* by qPCR for Monitoring of Antibiotic Resistance of Wastewater, Surface Water, and Recycled Water

**Authors:** Krista Liguori<sup>1</sup>; Jeanette Calarco<sup>2</sup>; Gabriel Maldonado Rivera<sup>1</sup>; Anna Kurowski<sup>1</sup>;  
Ishi Keenum<sup>1</sup>; Benjamin Davis<sup>1</sup>; Valerie J. Harwood<sup>2</sup>; Amy Pruden<sup>1\*</sup>

1 Via Department of Civil and Environmental Engineering, Virginia Tech, Blacksburg, Virginia  
24060 USA

2 Department of Integrative Biology, University of South Florida, Tampa, Florida 33620 USA

\*Corresponding Author

#### **Summary of contents:**

- 11 pages, 7 figures, 5 tables

**Table S1:** Sample volumes used to concentrate samples for culture assays by membrane filtration

| Water Matrix        | Media                       | Filtration Amount                            |
|---------------------|-----------------------------|----------------------------------------------|
| Wastewater influent | Modified mTEC               | 1 mL (at $10^{-2}$ , $10^{-3}$ , $10^{-4}$ ) |
|                     | Modified mTEC w/ cefotaxime | 1 mL (at $10^{-1}$ , $10^{-2}$ , $10^{-3}$ ) |
| Wastewater effluent | Modified mTEC               | Up to 500 mL (until filter refusal)          |
|                     | Modified mTEC w/ cefotaxime | Up to 500 mL (until filter refusal)          |
| Recycled Water      | Modified mTEC               | Up to 500 mL (until filter refusal)          |
|                     | Modified mTEC w/ cefotaxime | Up to 500 mL (until filter refusal)          |
| Surface Water       | Modified mTEC               | 1, 10, 100 mL                                |
|                     | Modified mTEC w/ cefotaxime | 10, 100, 250 mL                              |

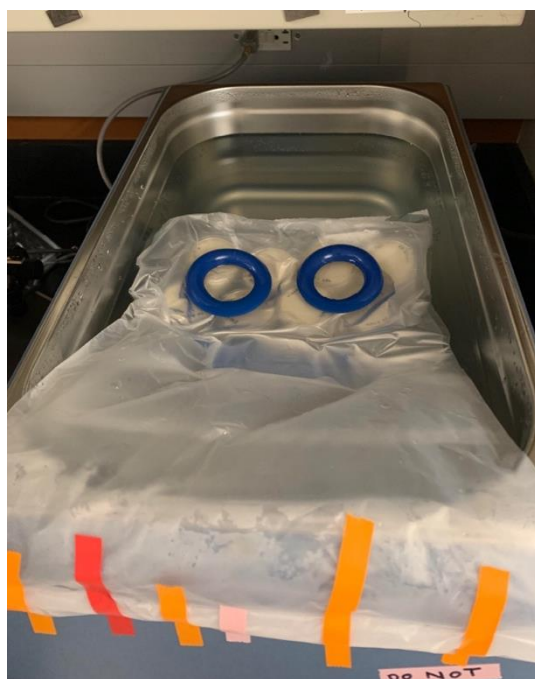

**Figure S1:** Set up and submersion of culture plates in the water bath

**Table S2: PCR Sequence for species confirmation by *uidA***

| Target      | Type              | Sequence (5' to 3')                                  | Rationale                           | Reference                         |
|-------------|-------------------|------------------------------------------------------|-------------------------------------|-----------------------------------|
| <i>uidA</i> | Intercalating dye | F)<br>CAACGAACTGAACTGGCAGA;<br>R) CATTACGCTGCGATGGAT | <i>E. coli</i> species confirmation | Modified from Chern et al., 2009* |

\*Chern et al. assay was published using a probe and was adapted here as an intercalating dye-based assay for presence/absence of *E. coli* species.

**Table S3: qPCR Sequence *sul1/intI* Gblock standard**

**Combined Gblock sequence for both *sul1* and *intI1*:**

tgcatgatctacgtgctcacatgcagtagCGCACCCGGAACATCGCTGCACGTGCTGTCGAACCTTCAAAAGCTGAAGTC  
GGCGTTGGGGCTTCCGCTATTGGTCTCGGTGTCGCGGAAATCCTTCTTGGGCGCCACCGTTGGCCTTCCTGTAA  
AGGATCTGGGTCCAGCGAGCCTTGCGGCGGAACCTCAActgtgaggactctaCTGGATTTCGATCACGGCACGATCA  
TCGTGCGGGAGGGCAAGGGCTCCAAGGATCGGSCCTTGATGTTACCCGAGAGCTTGGCACCCAGCCTGCGCG  
AGCAGCTGTCGCGTGACGGGCATGGTGGCTGAAGGACCAGGCCGAGGGCCGACGCGGCGTTGCGCTTCCCG  
ACGCCCTTGAGCGGAAGTATCCGCGCGCCGGGCATTCTGGCCGTGGTCTGGGTTTTCGCGAGCACACGCAT  
TCGACCGATCACGGAGCGGTGTCGTGCGTCGCCATCACATGTATGACCAGACCTTCAGCGCGCCTTCAAACG  
TGCCGTAGAACAAGCAGGCATCACGAAGCCCGCCACACCGCACACCCTCCGCCACTCGTTCGCGACGGCCTTGC  
TCCGACGCGTTACGACATTCGAACCGTGCAGGATCTGCTCGGCCATTCCGACGTCTCTACGACGATGATTAC  
ACGCATGTcactagctcagattcagtagaccgctgttg

Key:

Spacers

Sul1 Forward primer

Sul1 Reverse Primer Complement

IntI1 Forward Primer

IntI1 Probe

IntI1 Reverse Primer Complement

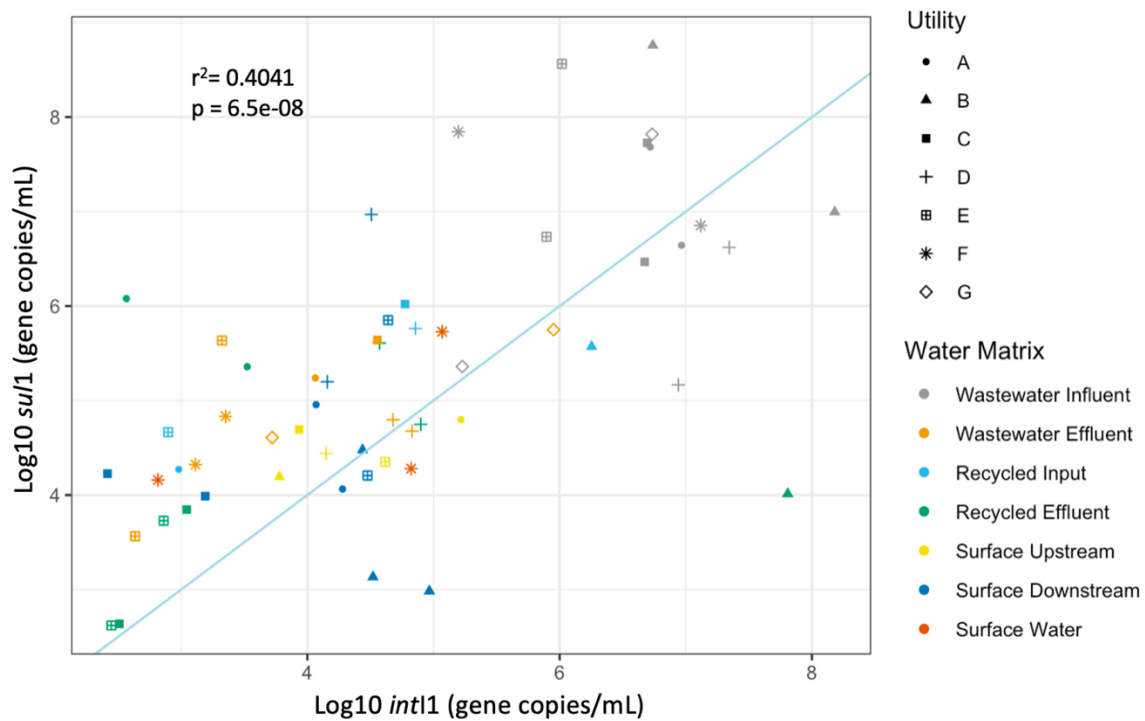

**Figure S2:** Correlation of *sul1* and *int11* (gene copies/ml), with shape indicating utility where sample was collected and color indicating water matrix. Adjusted linear regression  $r$ -squared value and  $p$ -value are reported. Biological replicates analyzed at both Virginia Tech and University of South Florida are combined for this analysis. Light blue lines delineate a 1:1 relationship.

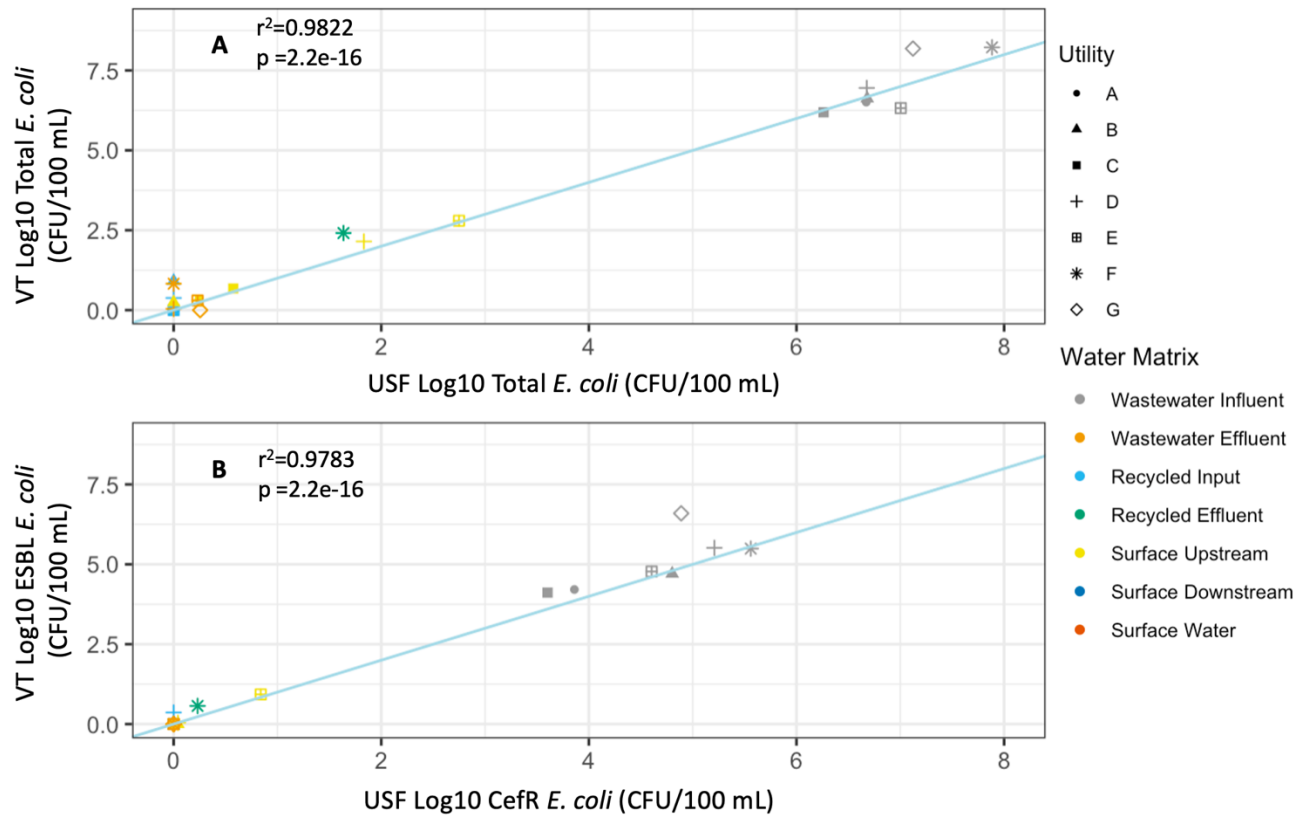

**Figure S3:** Inter-lab comparison of total *E. coli* (A) and *cefR E. coli* (B) concentrations measured across water matrices, with USF on the x-axis and VT on the y-axis. Note that recycled input and surface upstream samples were not collected at USF and therefore were omitted in this analysis. Light blue lines delineate a 1:1 relationship.

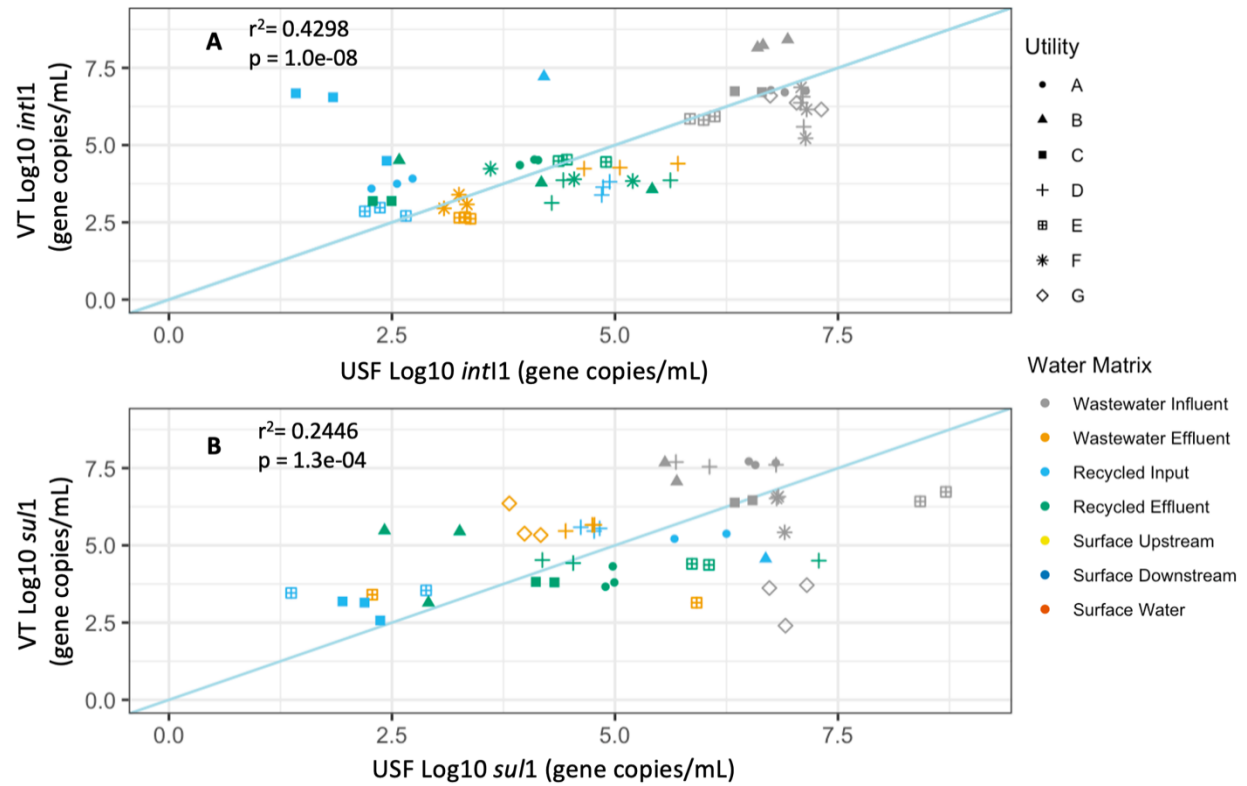

**Figure S4:** Inter-lab comparison of *int11* (A) and *sul1* (B) qPCR measurements. Recycled input and surface upstream samples were not analyzed at USF and are excluded from this analysis.

Light blue lines delineate a 1:1 relationship.

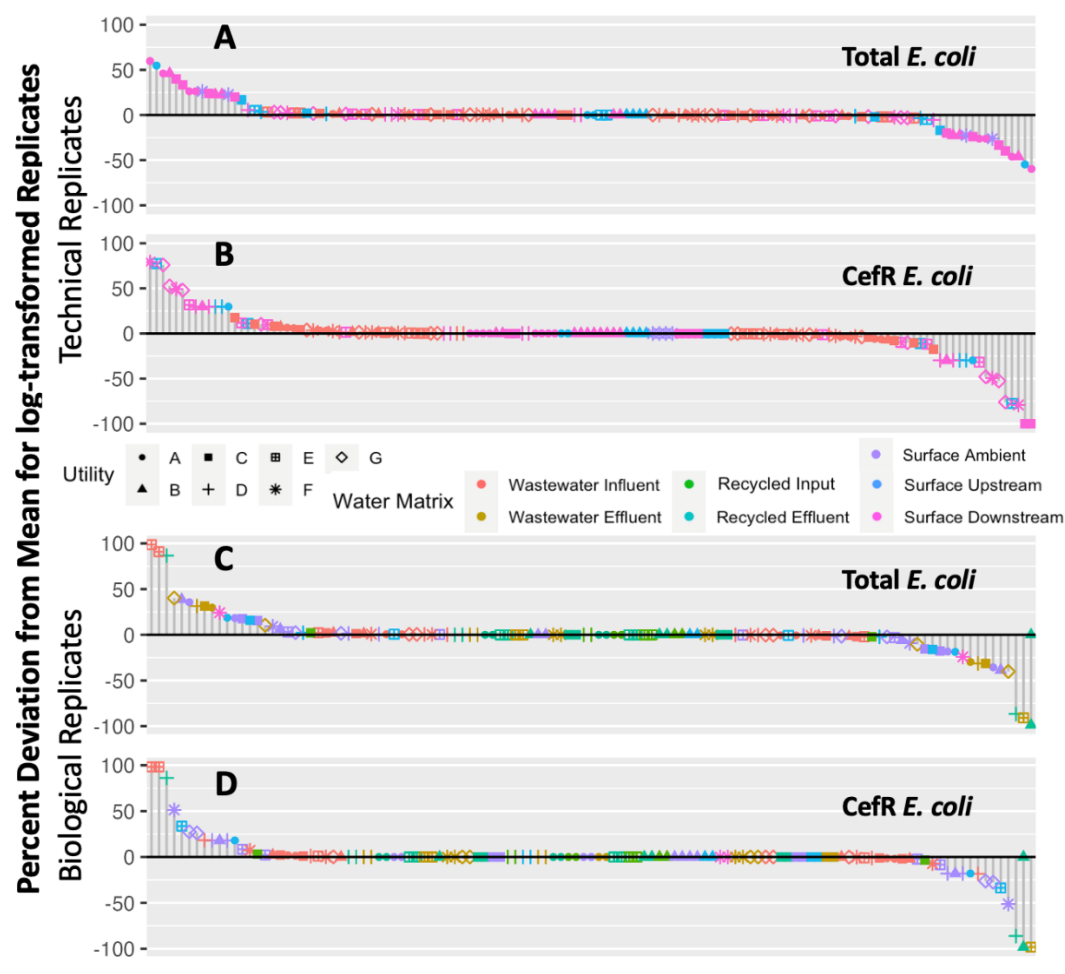

**Figure S5:** The percent difference from the mean for each technical replicate for total *E. coli* (A) and *cefR E. coli* (B) and biological replicate for total *E. coli* (C) and *cefR E. coli* (D) of each sample cultured (samples are unlabeled across the X-axis). Colors indicate water matrix sample; Shapes indicate utility where sample was collected. The mean here is the average of three technical and biological replicates, respectively, collected at the same site and time, and processed at the same laboratory. The horizontal line indicates 0% deviation from the mean as a reference. Replicates analyzed at both Virginia Tech and University of South Florida are all included in this analysis.

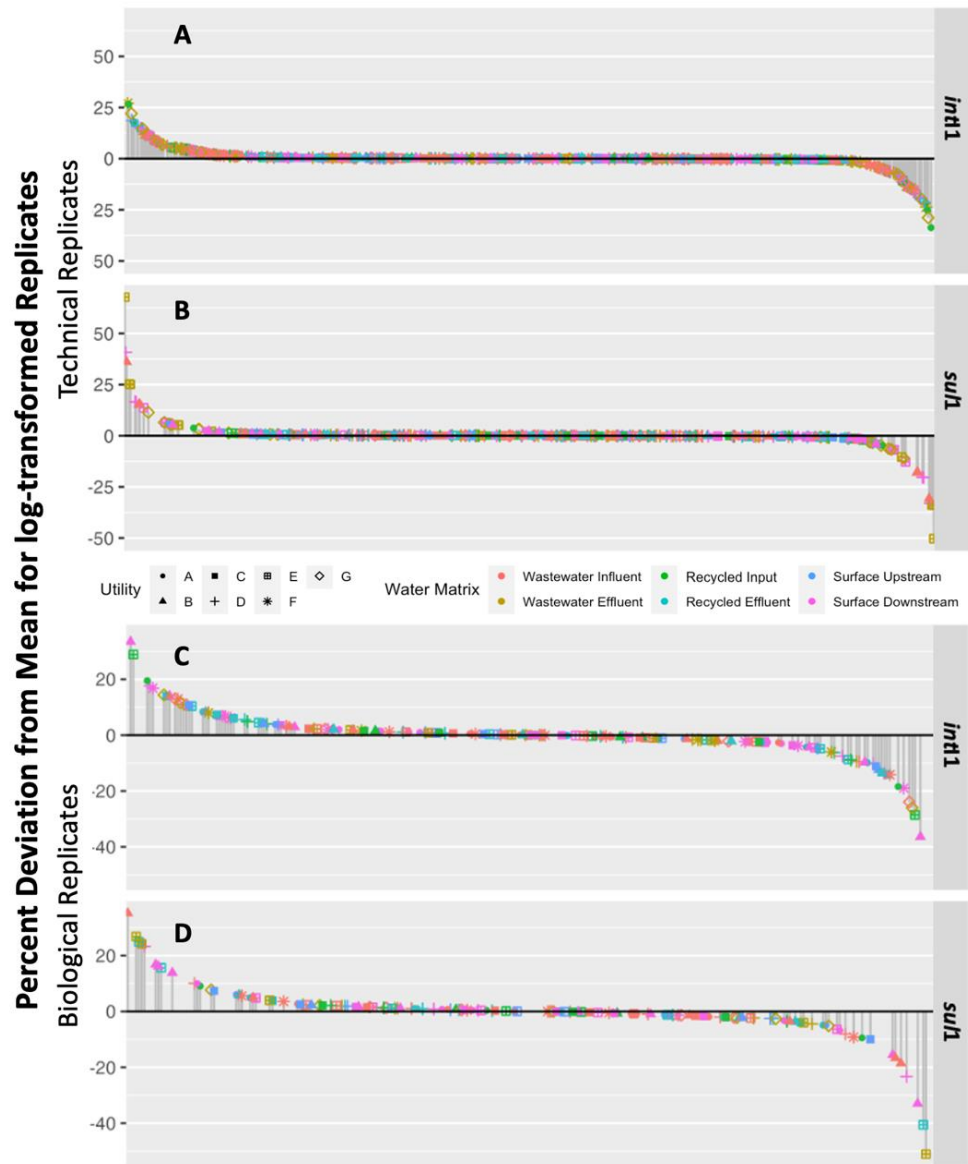

**Figure S6:** The percent difference from the mean for each technical replicate for *intI1* (A) and *sul1* (B) and biological replicate for *intI1*(C) and *sul1* (D) of each sample (samples are unlabeled across the X-axis). Colors indicate water matrix sample; Shapes indicate utility where sample was collected. The mean here is the average of three technical and biological replicates, respectively, collected at the same site and time, and processed at the same laboratory. The horizontal line indicates 0% deviation from the mean as a reference. Replicates analyzed at both Virginia Tech and University of South Florida are all included in this analysis.

**Table S4: Estimates and assumptions for cost analysis of methods for 6 samples (plus biological and technical triplicate for qPCR; plus biological triplicate and technical duplicate for culture)**

| Method              | Target                                                                                                                                                                                                                                                                                                                                                                                                  | Lower Estimate, Consumables Only | Upper Estimate, Consumables Only | Estimated Consumable Cost per Sample | Estimated Hours |
|---------------------|---------------------------------------------------------------------------------------------------------------------------------------------------------------------------------------------------------------------------------------------------------------------------------------------------------------------------------------------------------------------------------------------------------|----------------------------------|----------------------------------|--------------------------------------|-----------------|
| Culture             | total <i>E. coli</i> and cefR <i>E. coli</i>                                                                                                                                                                                                                                                                                                                                                            | \$ 120.35                        | \$ 222.63                        | \$20-37                              | 8-9             |
| qPCR                | <i>sul1</i> and <i>int11</i>                                                                                                                                                                                                                                                                                                                                                                            | \$ 572.78                        | \$ 645.93                        | \$95-108                             | 9-14            |
| <b>Assumptions:</b> | <ul style="list-style-type: none"> <li>- Culture estimated hours for one technician; qPCR estimated hours range from 1 to 2 technicians at upper estimate.</li> <li>- Lower estimates determined using Virginia Tech's negotiated rates with preferred vendors.</li> <li>- Upper estimates determined using listing prices on the same vendor's sites as viewed without institutional login.</li> </ul> |                                  |                                  |                                      |                 |

**Table S5: Capital Costs Associated with Methods**

| Method  | Equipment                                       | Use                                | Lower Estimate | Upper Estimate |
|---------|-------------------------------------------------|------------------------------------|----------------|----------------|
| Culture | Water Bath                                      | Incubation                         | \$591          | \$3,811        |
|         | Incubator                                       | Incubation                         | \$1,677        | \$8,643        |
|         | <b>Total equipment costs: \$2,268 – 12,454</b>  |                                    |                |                |
| qPCR    | Homogenizer                                     | DNA extraction                     | \$12,607       | \$16,597       |
|         | Mini centrifuge                                 | Preparation of master mix          | \$178          | \$450          |
|         | Thermal Cycler                                  | Run qPCR                           | \$20,000       | \$40,000       |
|         | Maintenance/year                                | Thermal cycler                     | \$10,000       | \$12,000       |
|         | Computer                                        | Edit qPCR cycles and download data | \$499          | \$1,500        |
|         | <b>Total equipment costs: \$43,284 – 70,547</b> |                                    |                |                |
| ddPCR   | Homogenizer                                     | DNA extraction                     | \$12,607       | \$16,597       |
|         | Mini centrifuge                                 | Preparation of master mix          | \$178          | \$450          |

|  |                                                           |                                                      |           |         |
|--|-----------------------------------------------------------|------------------------------------------------------|-----------|---------|
|  | System with droplet generator, plate reader, and computer | Uniform droplet generation, plate run, download data | \$132,610 | 176,814 |
|  | Plate sealer                                              | Uniform seal                                         | \$4,293   | \$4,434 |
|  | Total equipment costs: \$149,688 – 198, 295               |                                                      |           |         |

*\*All three methods utilize a biosafety cabinet and an autoclave, therefore those pieces of equipment were not included in the comparative cost analyses.*

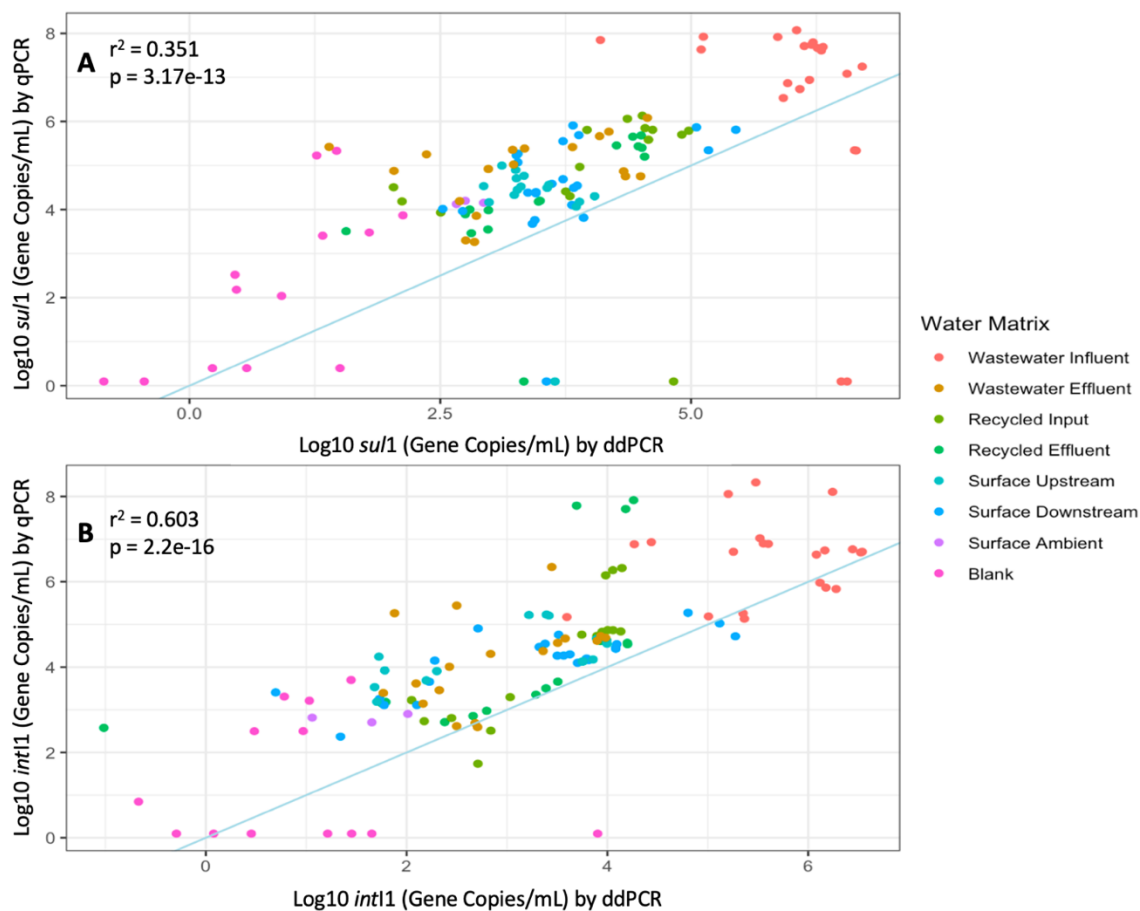

**Figure S7:** Correlation of *sul1* (A) and *int1* (B) concentrations (gene copies/ml) by qPCR and ddPCR. Color indicates water matrix. Adjusted linear regression *r*-squared value and *p*-value are reported. biological replicates analyzed at Virginia Tech are included in this analysis. ddPCR was conducted by partners at US EPA's Office of Research and Development. Light blue lines delineate a 1:1 relationship.

| Correlation:                        | Wastewater<br>influent                 | Wastewater<br>Effluent       | Recycled<br>Input            | Recycled<br>Effluent                            | Surface<br>Upstream          | Surface<br>Downstream                 |
|-------------------------------------|----------------------------------------|------------------------------|------------------------------|-------------------------------------------------|------------------------------|---------------------------------------|
| <b>Total E. coli<br/>(VT x USF)</b> | <b>p = 0.033</b><br><b>Rho = -0.75</b> | P = 0.82<br>Rho = -0.63      | _*                           | P = NA<br>Rho = NA                              | _*                           | <b>P = 0.008</b><br><b>Rho = 1</b>    |
| <b>CefR E. coli<br/>(VT x USF)</b>  | <b>P = 0.017</b><br><b>Rho = 0.82</b>  | P = NA<br>Rho = NA           | _*                           | P = NA<br>Rho = NA                              | _*                           | <b>P = 0.043</b><br><b>Rho = 0.92</b> |
| <b>Sul1<br/>(VT x USF)</b>          | P = 0.98<br>Rho = -0.49                | P = 0.56<br>Rho = -<br>0.048 | _*                           | <b>P = 0.026</b><br><b>Rho =</b><br><b>0.61</b> | _*                           | P = 0.66<br>Rho = -0.12               |
| <b>intl1<br/>(VT x USF)</b>         | P = 0.69<br>Rho = -0.12                | P = 0.06<br>Rho = 0.57       | _*                           | P = 0.604<br>Rho = -<br>0.077                   | _*                           | P = 0.532<br>Rho = -0.077             |
| <b>Total E. coli<br/>x sul1</b>     | P = 0.23<br>Rho = 0.21                 | P = 0.71<br>Rho = -0.20      | P = 0.23<br>Rho =<br>0.21    | P = 0.24<br>Rho =<br>0.27                       | P = 0.53<br>Rho = 0.0        | <b>P = 0.039</b><br><b>Rho = 0.55</b> |
| <b>CefR E. coli<br/>x sul1</b>      | P = 0.47<br>Rho = 0.024                | P = NA<br>Rho = NA           | P = 0.47<br>Rho =<br>0.024   | P = 0.18<br>Rho =<br>0.34                       | P = 0.53<br>Rho = -<br>0.051 | P = 0.17<br>Rho = 0.32                |
| <b>Total E. coli<br/>x intl1</b>    | P = 0.631<br>Rho = -<br>0.095          | P = 0.96<br>Rho = -0.58      | P = 0.63<br>Rho = -<br>0.095 | <b>P = 0.032</b><br><b>Rho =</b><br><b>0.64</b> | P = 0.26<br>Rho = 0.4        | P = 0.59<br>Rho = -0.078              |
| <b>CefR E. coli<br/>x intl1</b>     | P = 0.33<br>Rho = 0.13                 | P = NA<br>Rho = NA           | P = 0.33<br>Rho =<br>0.13    | <b>P = 0.046</b><br><b>Rho =</b><br><b>0.59</b> | P = 0.11<br>Rho =<br>0.67    | <b>P = 0.036</b><br><b>Rho = 0.56</b> |

**Table S6: Spearman correlation for each set of variables for which overall correlations were presented in this paper, with relationship tested within each individual water matrix to assess impact of water matrix variety.**

- *\*recycled influent and surface upstream samples were not collected at USF and therefore no correlation analysis was possible.*
- *Statistically significant correlations bolded for emphasis.*

## References

- a) Chern, E. C., Brenner, K. P., Wymer, L., & Haugland, R. A. (2009). Comparison of Fecal Indicator Bacteria Densities in Marine Recreational Waters by QPCR. *Water Quality, Exposure and Health*, 1(3–4), 203–214. <https://doi.org/10.1007/s12403-009-0019-2>
